# Supplementary material
Source: publisher figshare collection journal article supplement (https://sage.figshare.com/ndownloader/files/17282555)
Supplement: Supplementary file 1 [file 17282555]

## Urban food insecurity and its determinants: a baseline study of Bengaluru

### Supplementary information

#### 1. Note on scaled scores

i. For calculating the Household Food Insecurity Access Scale (HFIAS), the following questions were asked:

Question: I would like to start off by reading some statements that people have made about their household's food consumption over the past four weeks. For each statement I would like you to tell me whether this happened rarely, sometimes, often or never in the past four weeks.

- a. In the past four weeks, did you worry that your household would not have enough food?
- b. In the past four weeks, were you or any household member not able to eat the kinds of foods you preferred because of a lack of resources?
- c. In the past four weeks, did you or any household member have to eat a limited variety of foods due to a lack of resources?
- d. In the past four weeks, did you or any household member have to eat some foods that you really did not want to eat because of a lack of resources to obtain other types of food?
- e. In the past four weeks, did you or any household member have to eat a smaller meal than you felt you needed because there was not enough food?
- f. In the past four weeks, did you or any household member have to eat fewer meals in a day because there was not enough food?
- g. In the past four weeks, was there ever no food to eat of any kind in your household because of lack of resources to get food?
- h. In the past four weeks, did you or any household member go to sleep at night hungry because there was not enough food?
- i. In the past four weeks, did you or any household member go a whole day and night without eating anything because there was not enough food?
- j. In the past four weeks, did you or any household member eat a cooked meal less than once a day?

ii. For calculating the Household Dietary Diversity Score (HDDS), the following questions were asked:

Question: Now I would like to ask you about the types of foods that you or anyone else in your household ate yesterday during the day and at night.

- a. Cereals – Rice, wheat, jowar, bajra, ragi, maize, barley, maida, suji, rawa, oats, others
- b. Any potatoes, sweet potatoes, beetroots, carrots and other tubers or any other foods made from them (e.g. chips, crisps)
- c. Any other vegetables
- d. Any fruits
- e. Any beef, pork, lamb, goat, chicken, duck, other birds
- f. Any eggs
- g. Any fresh fish, dried fish or shellfish (e.g. crabs, prawns etc)
- h. Any foods made from pulses – tur, arhar, urad, moong, masoor, gram - beans, peas, lentils, or nuts, besan or other pulse products
- i. Any cheese, yoghurt, milk or other milk/dairy products like paneer
- j. Any foods made with oil, butter, ghee
- k. Any sugar, jaggery or honey (including sugar in tea, coffee etc)
- l. Any other foods such as condiments, coffee, tea
